# Supplementary material for: Development of a facile droplet-based single-cell isolation platform for cultivation and genomic analysis in microorganisms
Source: PubMed Central journal article supplement (PMC5253770; doi:10.1038/srep41192), 2017-01-23
Supplement: srep41192-s1.pdf [file srep41192-s1.pdf]

1 **Supplementary Information for**

2  
3 **Development of a facile droplet-based single-cell isolation platform for**  
4 **cultivation and genomic analysis in microorganisms**

5 Qiang Zhang<sup>1,+</sup>, Tingting Wang<sup>1,+</sup>, Qian Zhou<sup>1,2</sup>, Peng Zhang<sup>1</sup>, Yanhai Gong<sup>1</sup>, Honglei  
6 Gou<sup>1</sup>, Jian Xu<sup>1,\*</sup> and Bo Ma<sup>1,\*</sup>

7  
8 <sup>1</sup> Single-Cell Center, CAS Key Laboratory of Biofuels and Shandong Key Laboratory  
9 of Energy Genetics, Qingdao Institute of Bioenergy and Bioprocess Technology,  
10 Chinese Academy of Sciences, Qingdao, 266101, China

11 <sup>2</sup> Key Laboratory for Sustainable Development of Marine Fisheries, Ministry of  
12 Agriculture, Yellow Sea Fisheries Research Institute, Chinese Academy of Fishery  
13 Sciences, Qingdao, 266071, China

14  
15 <sup>+</sup> These authors contributed equally to this work.

16 <sup>\*</sup>Correspondence: mabo@qibebt.ac.cn; xujian@qibebt.ac.cn

## 17 **Supplementary Materials and Methods**

### 18 **Materials**

19 Budding yeast strains *Saccharomyces cerevisiae* BY4742 and *Phaffia rhodozyma*  
20 ATCC 24202 were maintained on YPD agar plate (10 g/l yeast extract, 20 g/l peptone,  
21 20 g/l D-glucose and 15 g/l agar) at 4 °C. Before each cell isolation trial, a single  
22 colony was selected and inoculated in YPD broth (10 g/l yeast extract, 20 g/l peptone  
23 and 20 g/l D-glucose) and grew at 30 °C while shaking at 180 rpm overnight. The *P.*  
24 *rhodozyma* cells show orange color in tubes and under microscope as they synthesize  
25 carotenoid astaxanthin during growth<sup>1</sup>. The microalgae strain *Chlamydomonas*  
26 *reinhardtii* CC124 (<http://chlamycollection.org/>) was maintained on TAP  
27 (Tris-acetate-phosphate) plate and inoculated in TAP broth under continuous lighting  
28 (approximate 150 μmol photons/m<sup>2</sup>/s) at 25 °C and was bubbled with air to ensure  
29 mixing and prevent settling<sup>2</sup>. Cells were harvested at stationary phase.

30

### 31 **Real-time qPCR of single-cell DNA**

32 Eighty well of a 96-well PCR plate were each filled with 1 μl of PBS buffer (pH 8.0)  
33 before single-cell droplet collection. Sixty droplets each with a single *S. cerevisiae*  
34 cell and twenty blank droplets were then collected successively in these wells. Cells  
35 were lysed by adding 1.5 μl of buffer D2 (REPLI-g Single Cell Kit; Qiagen, USA)  
36 containing 0.08 mol/L dithiothreitol (DTT) and was incubated at 65 °C for 10 min,  
37 followed by neutralization with 1.5 μl of Stop Solution (REPLI-g Single Cell Kit;  
38 Qiagen, USA). The volume of droplet after cell lysis was about 5 μl.

39 Genomic DNA (gDNA) was extracted from *S. cerevisiae* culture at stationary stage  
40 with E.Z.N.A.® Yeast DNA Kit (Omega Bio-Tek, USA) and diluted to a series of  
41 seven final concentrations as 0.5, 5, 50, 500, 5000, 5 × 10<sup>4</sup> and 5 × 10<sup>5</sup> fg/μl for the  
42 establishment of a standard curve. A 162-bp fragment of yeast *ALG9* gene was  
43 amplified using primer pair ALG9-F and ALG9-R (Supplementary Table S1 online)<sup>3</sup>.  
44 Each 12-μl reaction contained 6 μl of 2× Reaction Mix (LightCycler FastStart DNA  
45 Master SYBR Green I; Roche, USA), 25 pmol of each primer and 1 μg of BSA  
46 (Invitrogen, USA). The 5-μl lysate or 1 μl of DNA standard samples of concentration  
47 gradient was used as template. Reactions for standards were performed in duplicate.  
48 The left two wells were used as negative controls and 1 μl of DNase/RNase-free water  
49 was used as template in each reaction.

50 The qPCR reactions were performed on a LightCycler 480 Real-Time PCR System

51 (Roche Applied Science, USA). The thermocycling program consisted of heating at  
52 95 °C for 10 min, followed by 70 cycles of 15 s at 95 °C and 1 min at 55 °C. After all  
53 cycles, amplification specificity was monitored via melting curve analysis of PCR end  
54 products by increasing the temperature at a rate of 0.5 °C per 5 s from 60 to 95 °C  
55 with continuous fluorescence collection.

56

### 57 **Reverse transcription PCR (RT-PCR) of single-cell RNA**

58 RT-PCR was performed as described in previous literature<sup>4</sup>. Lysis buffer was prepared  
59 by adding 1 µl of RNase inhibitor (40 U/µl, Clontech, USA) to 19 µl of a 0.2%  
60 (vol/vol) Triton X-100 solution right before experiment and shortly stored at 4 °C. Ten  
61 droplets each with a single *C. reinhardtii* cell and two blank droplets were collected  
62 individually in a 0.2-ml PCR tube containing 2 µl of lysis buffer. After adding 1 µl of  
63 Oligo-dT<sub>30</sub>VN primer (10 µM, 5'–AAGCAGTGGTATCAACGCAGAGTACT30VN)  
64 and 1 µl of dNTP mix (10 mM each; Fermentas, Lithuania) to each tube, cell lysis was  
65 accomplished by incubation at 72 °C for 3 min. First-strand and second-strand reverse  
66 transcription reactions were performed successively for double-stranded cDNA  
67 synthesis on an Eppendorf thermal cycler (Eppendorf AG, Germany) as described.  
68 PCR cycle numbers for first-strand and second-strand cDNA synthesis were set as 10  
69 and 25 respectively as suggested in the literature. The generated cDNA samples were  
70 purified with Ampure XP beads with 1:1 ratio, followed by electrophoretically  
71 analysis with an Agilent 2100 Bioanalyzer (Agilent Technologies, USA). DNA  
72 concentration was further estimated with the Qubit 2.0 instrument applying the Qubit  
73 dsDNA HS Assay (Life Technologies, USA). A primer pair named Cr-18S-F and  
74 Cr-18S-R (Supplementary Table S1 online), specifically targeting a 257-bp 18S rRNA  
75 gene fragment of *C. reinhardtii* CC124, was designed based on its 18S rRNA gene  
76 sequence (Genbank EU925397)<sup>5</sup> using Primer 5.0 software (Primer-E Ltd., UK) for  
77 the verification of positive amplification of *C. reinhardtii* cDNA. Each 25-µl reaction  
78 contained 2.5 µl of 10× Reaction Buffer, 1U of Taq (Takara, China), 1 µl of dNTP  
79 mix (10 mM each; Fermentas, Lithuania), 25 pmol of each primer and 1 µl of cDNA  
80 product. The PCR reactions were performed on an Eppendorf thermal  
81 cycler (Eppendorf AG, Germany) The amplicon was visualized with electrophoresis  
82 on a 1.2% agarose gel, purified and sequenced with the ABI 3700™ automated DNA  
83 sequencer (Applied Biosystems, USA).

84

85 **Single-cell whole genome amplification (WGA) and sequencing**

86 Ten droplets each with a single *S. cerevisiae* cell and two blank droplets were  
87 collected individually in a 0.2-ml PCR tube containing 1 µl of PBS buffer. Cells were  
88 lysed and neutralized as described above. After neutralization, all droplet samples  
89 were amplified with RepliPHI™ Phi29 DNA Polymerase (Epicentre, USA). The 15 µl  
90 reaction contained 1.5 µl of 10× reaction buffer, 50 µM random hexamers with  
91 phosphorothioate modification of the two 3'-terminal nucleotides (IDT DNA, USA)<sup>6</sup>,  
92 0.4 mM dNTP, 5% DMSO (Sigma, USA), 10 mM DTT (Sigma, USA) and 100 U  
93 Phi29<sup>7</sup>. A master mix of MDA reagents as above was assembled in a Safe-Lock 1.5 ml  
94 Eppendorf tube and UV treated on ice in the Stratalinker 2400 UV Crosslinker  
95 (Stratagene, USA) at 254 nm for 30 min in order to eliminate possible amplification  
96 of contaminating DNA as described before<sup>8</sup>. Afterwards, MDA reactions were run on  
97 an Eppendorf thermal cycler (Eppendorf AG, Germany) at 30 °C for 16 h followed by  
98 termination at 65 °C for 10 min. MDA products were checked by 0.8% agarose gel  
99 electrophoresis, followed by dilution of 1000 fold in DNase/RNase-free water and 1  
100 µl was used as template DNA in PCRs for validation. Primer pair NL1 /NL4 targeting  
101 partial 26S rRNA gene of *S. cerevisiae*<sup>9</sup> and 927F/1492R targeting partial bacterial  
102 16S rRNA gene<sup>10</sup> (Supplementary Table S1 online) were used to verify the positive  
103 amplification of yeast gDNA and no amplicon from bacterial DNA contaminant. PCR  
104 reactions were performed and products were checked as above.

105 For sequencing analysis, the single-cell DNA amplicon was digested with S1  
106 nuclease (Takara Bio Inc., Japan) in order to remove single-stranded DNA<sup>11</sup> according  
107 to the manufacturer's instructions followed by phenol-chloroform purification.  
108 Sequencing library was prepared with Accel-NGS 2S Plus DNA library Kit (Swift  
109 Biosciences, USA) with 50 ng amplified gDNA as input, and sequenced on Illumina  
110 HiSeq2500 platform with 2×150PE format. All generated reads were aligned to the  
111 reference genome of *S. cerevisiae* S288C (GenBank: GCF\_000146045.2) using the  
112 software Bowtie 1.1.2<sup>12</sup>, and assembled using IDBA\_UD 1.1<sup>13</sup>. The percent  
113 GC-content of reads aligned to each chromosome and the read coverage were  
114 calculated in nonoverlapping windows of length 100 bp respectively. Read coverage  
115 was calculated from read mapping information and log-transformed before use. The  
116 genome coverage was then visualized by a Perl application Circleator<sup>14</sup>.

117 **Supplementary Table and Figures**118 **Supplementary Table S1** Primer pairs used in this study

| Targeting gene                                       | Primer name | Sequence(5'-3')                  | Length of amplicon (bp) | Reference |
|------------------------------------------------------|-------------|----------------------------------|-------------------------|-----------|
| ALG9 gene of <i>S. cerevisiae</i>                    | ALG9-F      | CACGGATAGTGGCTTTGGTGAACAATTAC    | 162                     | 3         |
|                                                      | ALG9-R      | TATGATTATCTGGCAGCAGGAAAGAACTTGGG |                         |           |
| partial 18S rRNA gene of <i>C. reinhardtii</i> CC124 | Cr-18S-F    | GGGCATTCGTATTCCGTTGT             | 257                     | -         |
|                                                      | Cr-18S-R    | TTTCAGCCTTGCGACCAT               |                         |           |
| partial 26S rRNA gene of <i>S. cerevisiae</i>        | NL1         | GCCATATCAATAAGCGGAGGAAAAG        | 520                     | 9         |
|                                                      | NL4         | GGTCCGTGTTTCAAGACGG              |                         |           |
| partial bacterial 16S rRNA gene                      | 927F        | AAACTYAAAKGAATTGRCGG             | 565                     | 10        |
|                                                      | 1492R       | GGTTACCTTGTTACGACTT              |                         |           |

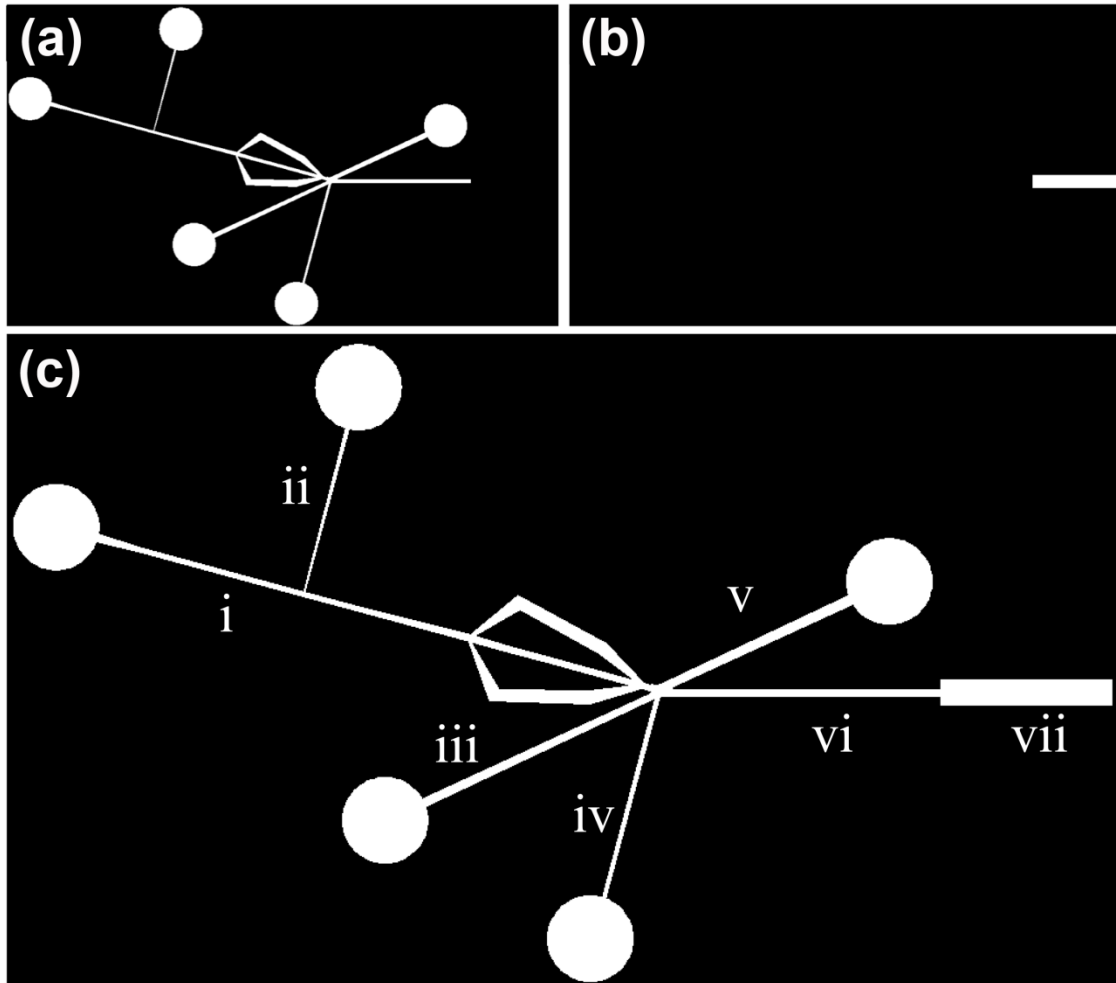

119

120

121

122

123

124

125

**Supplementary Fig. S1** Photolithography masks showing structures of all channels and inlet/outlet holes with a resolution of 12000 dpi. (a) Mask A with pattern of all microchannels and inlet/outlet holes for aims of importing oil or aqueous phase, connecting the solenoid valve and exporting wastes. (b) Mask B with pattern of the dispensing channel. (c) Alignment of both masks. Design width of the channels are as below: i: 70  $\mu\text{m}$ ; ii: 35  $\mu\text{m}$ ; iii: 90  $\mu\text{m}$ ; iv: 40  $\mu\text{m}$ ; v: 110  $\mu\text{m}$ ; vi: 100  $\mu\text{m}$ ; vii: 300  $\mu\text{m}$ .

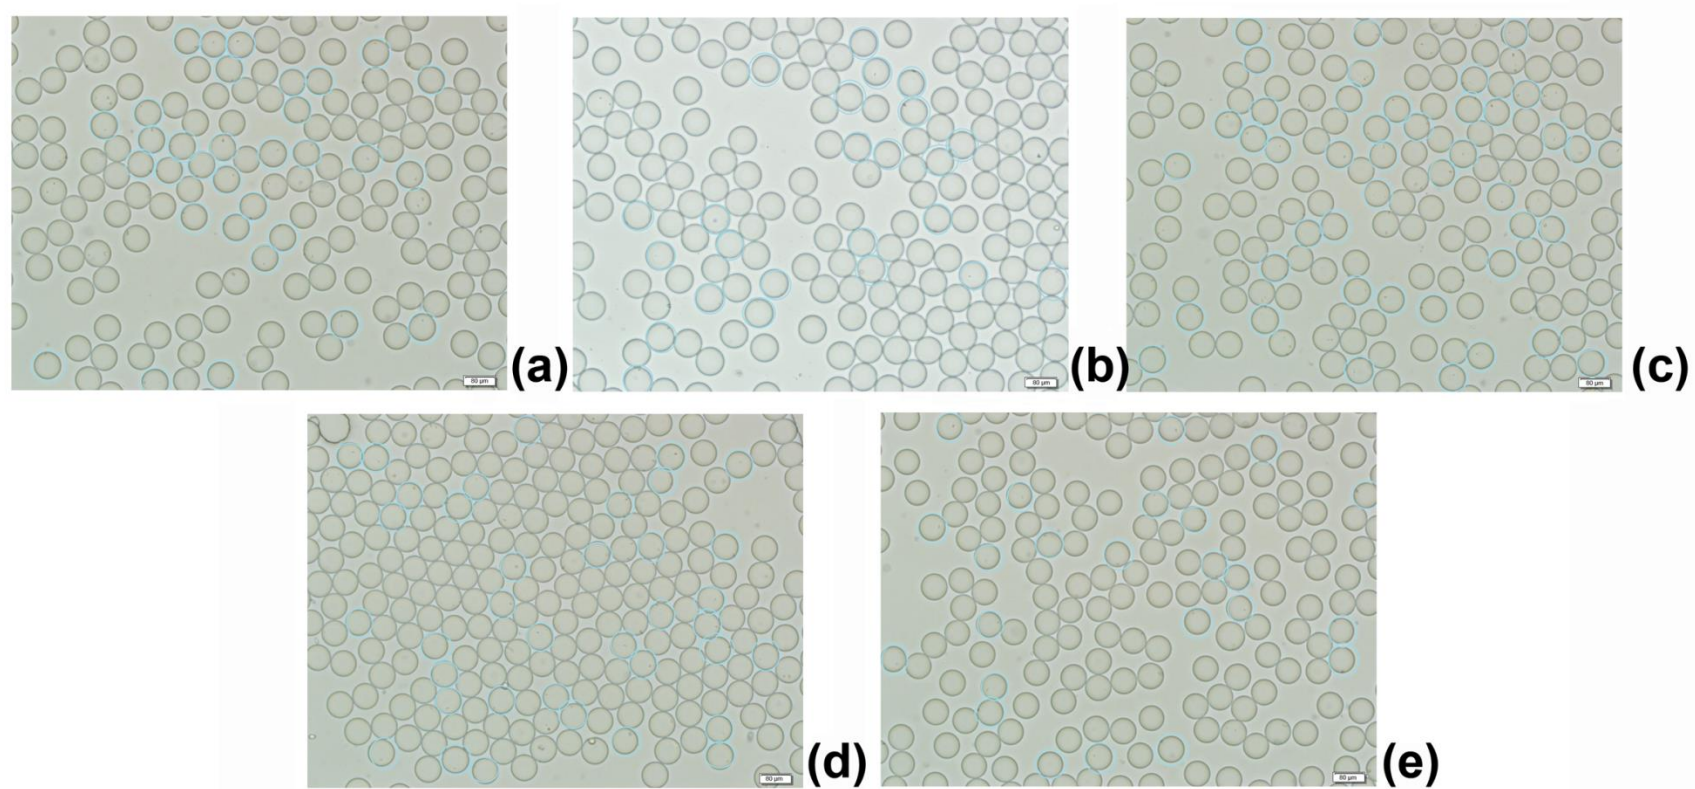

126

127 **Supplementary Fig. S2** Evaluation of the Poisson statistics. Droplets (diameter  $\approx 60 \mu\text{m}$ ) generated at the “T-junction” section was directly  
128 exported, dispensed on a hydrophilic glass slide pretreated with Pluronic® F127 and inspected under microscope. Five regions of the whole  
129 microscopic field was randomly selected, and number of cells in each droplet of the region was counted for estimating of the single-cell droplet  
130 ration. The number of single-cell droplets vs. total droplet number was 32/148 (a), 24/154 (b), 44/152 (c), 37/225 (d) and 24/155 (e) respectively.  
131 Therefore overall ratio of single-cell droplets was 19.3%.

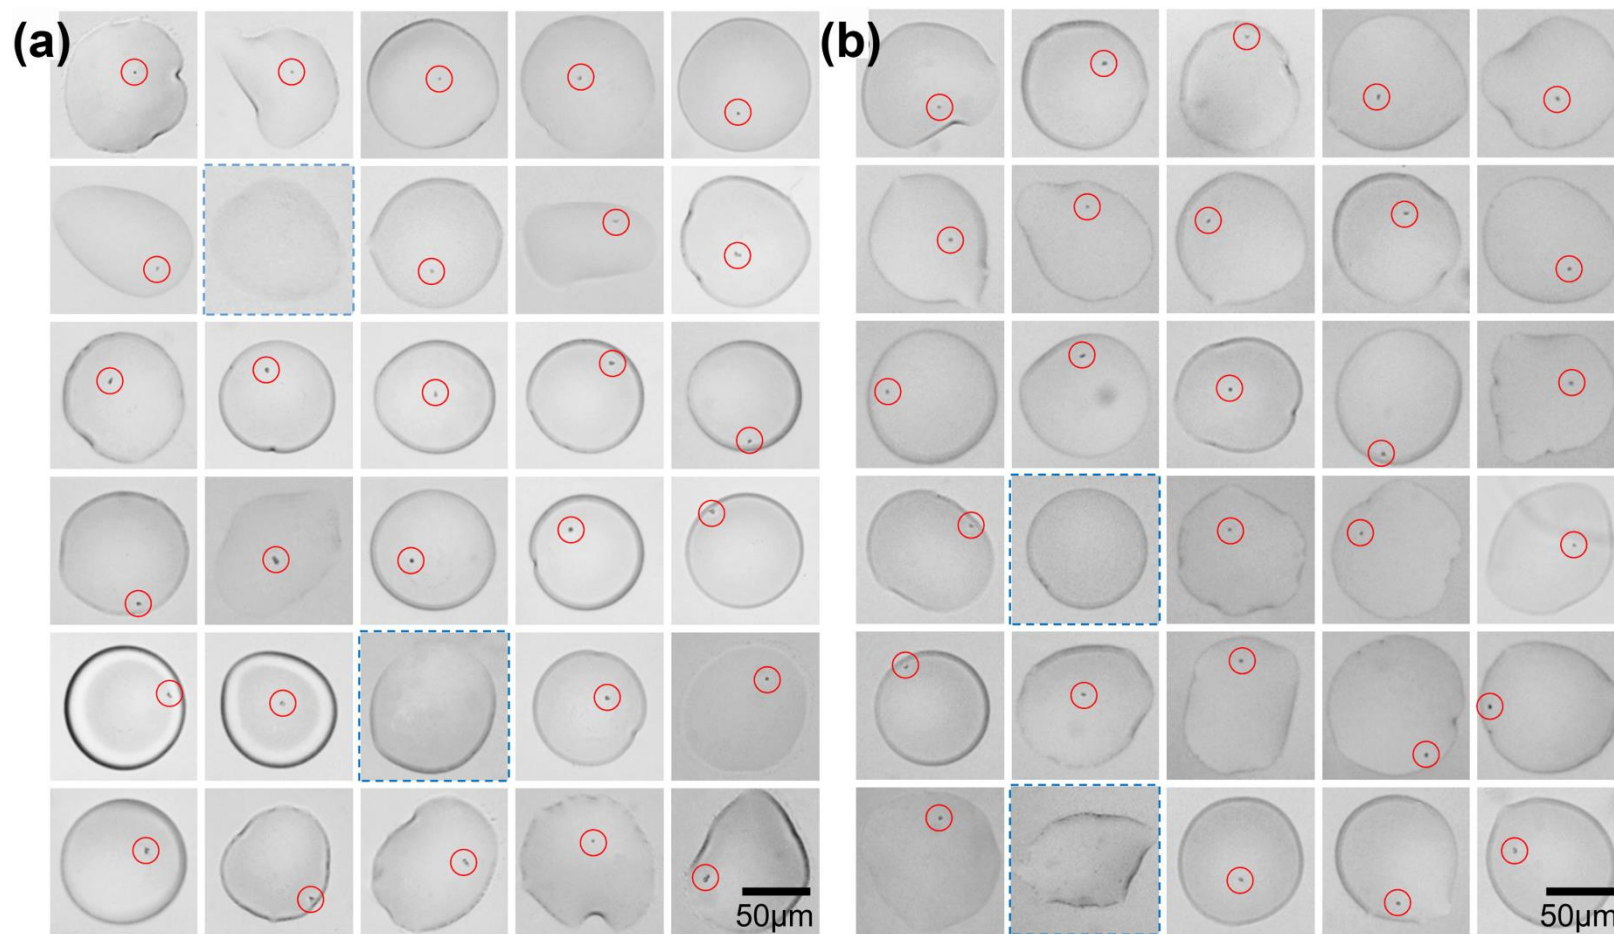

132

133 **Supplementary Fig. S3** Validation of the single-cell droplet isolation. All sorted droplets were dispensed on a glass slide; cell number in each  
 134 droplet was inspected under microscope. Single cells were marked with red circles; droplets without cells were marked with blue dotted boxes.

135 Shape of droplets varied due to different expansion on the glass slide. Two of the triplicates were shown in (a) and (b).



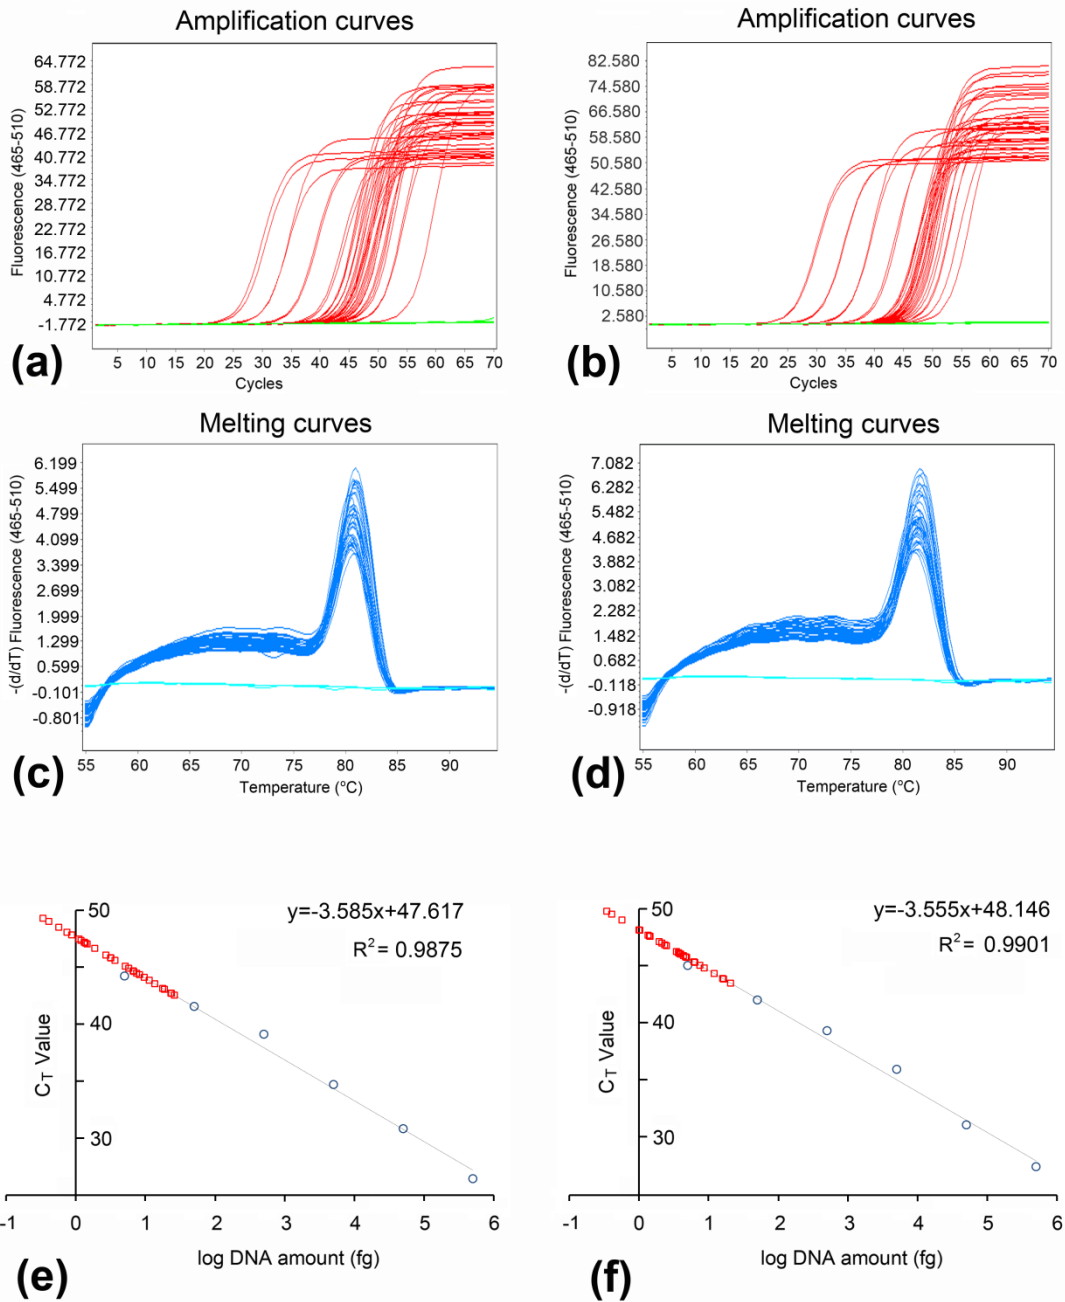

136

137 **Supplementary Fig. S4** Results of the single-cell qPCR assays. Two of the triplicates  
 138 were shown here. (a) and (b) were amplification curves of single-cell droplet samples  
 139 and standard DNA. The x axis represents PCR cycle number and the y axis represents  
 140 fluorescence intensity. (c) and (d) were melting curves of these samples. The x axis  
 141 represents melting temperatures and the y axis represents the  $-\Delta F/\Delta T$  (change in  
 142 fluorescence/change in temperature). (e) and (f) were linear fittings of log transformed  
 143 DNA concentrations vs.  $C_T$  values using standard DNA samples (dots). The single-cell  
 144 droplet samples (squares) were plotted on the fitting curve by  $C_T$  values.

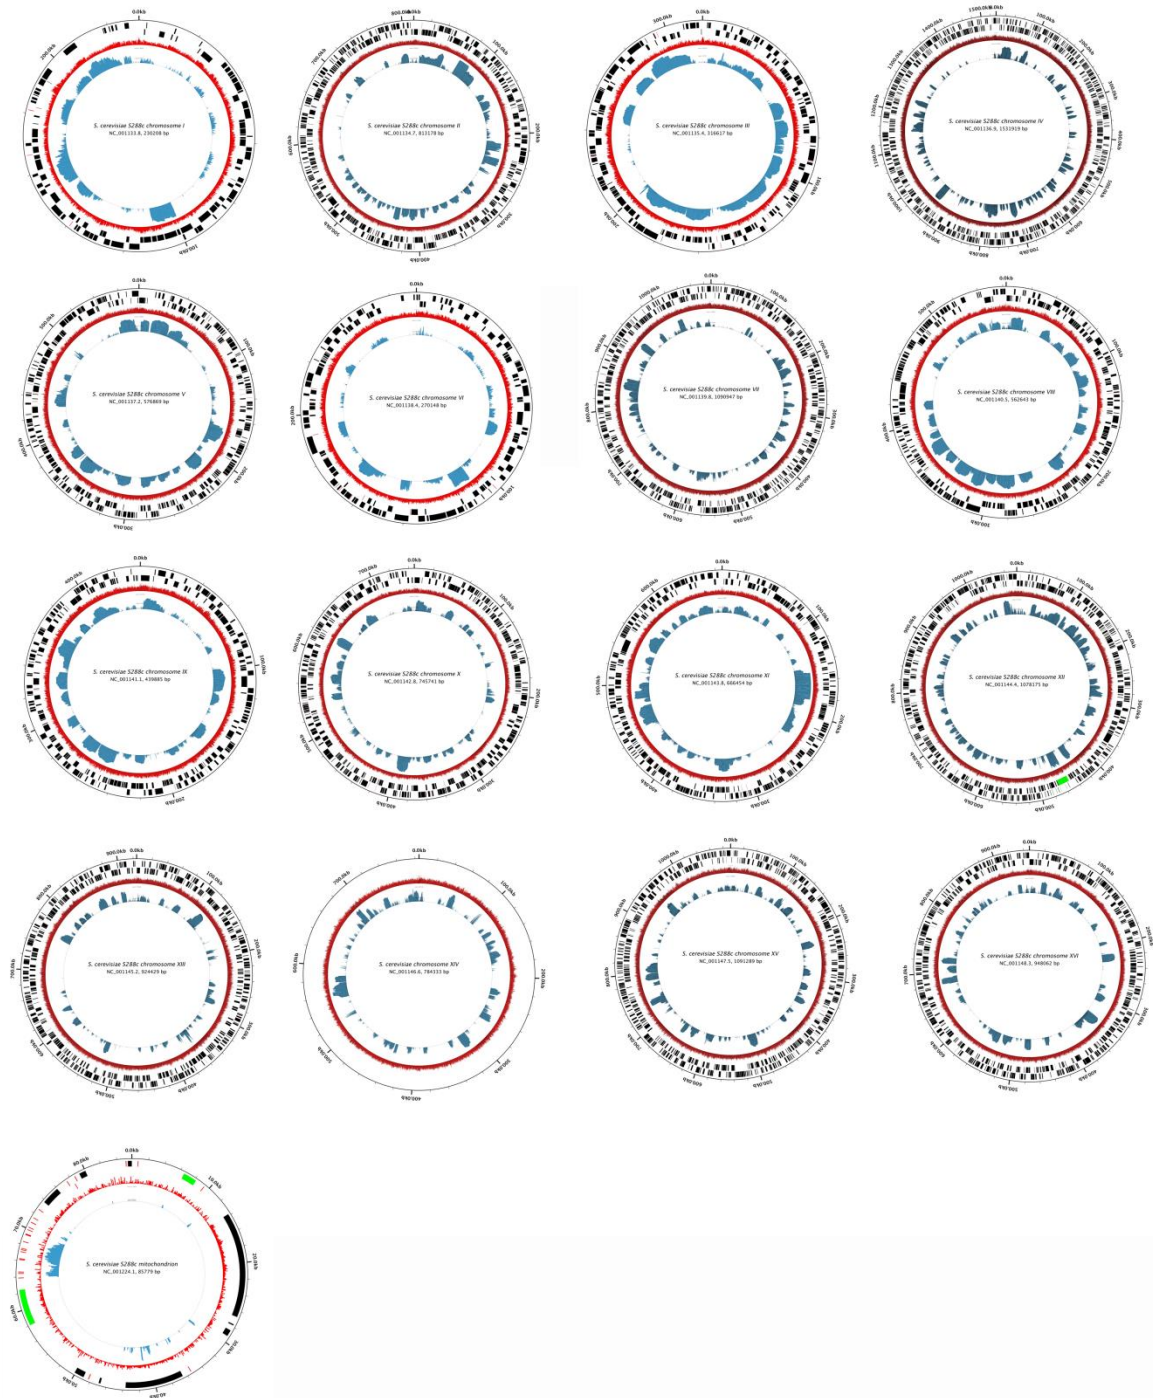

145  
 146 **Supplementary Fig. S5** The Circleator figure of reads aligned to the *S. cerevisiae*  
 147 S288c genome. From outside to inside: coordinate labels of the S288c genome;  
 148 forward and reverse strand genes of the S288c genome; percent GC content of the  
 149 sequencing reads of the single-cell sample (shown in red); read coverage of the  
 150 single-cell sample (shown in blue). The chromosome name, NCBI accession and size  
 151 were listed. Reads aligned to each of the 16 chromosomes as well as the  
 152 mitochondrial DNA were shown in individual figures.

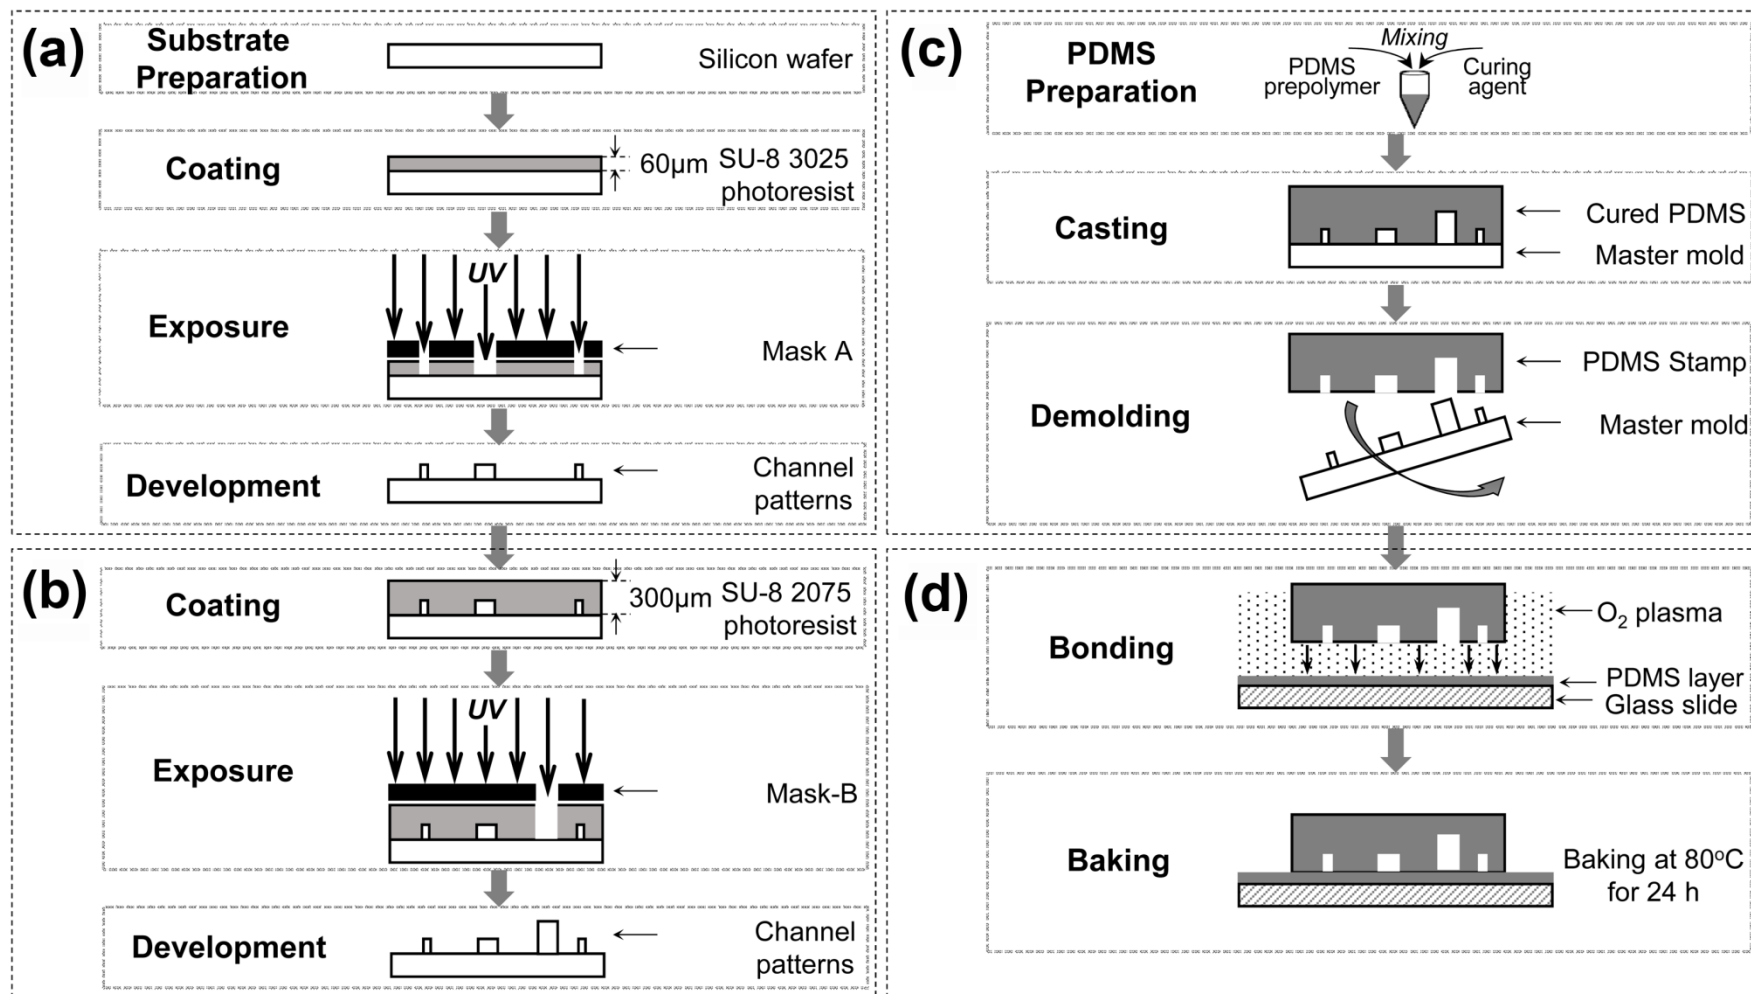

153

154 **Supplementary Fig. S6** Step-by-step fabrication of the microfluidic chip. (a) Fabrication of the microchannels. (b) Fabrication of the dispensing

155 channel. (c) Preparation of the PDMS chip. (d) Assembly of the PDMS chip and the glass substrate.

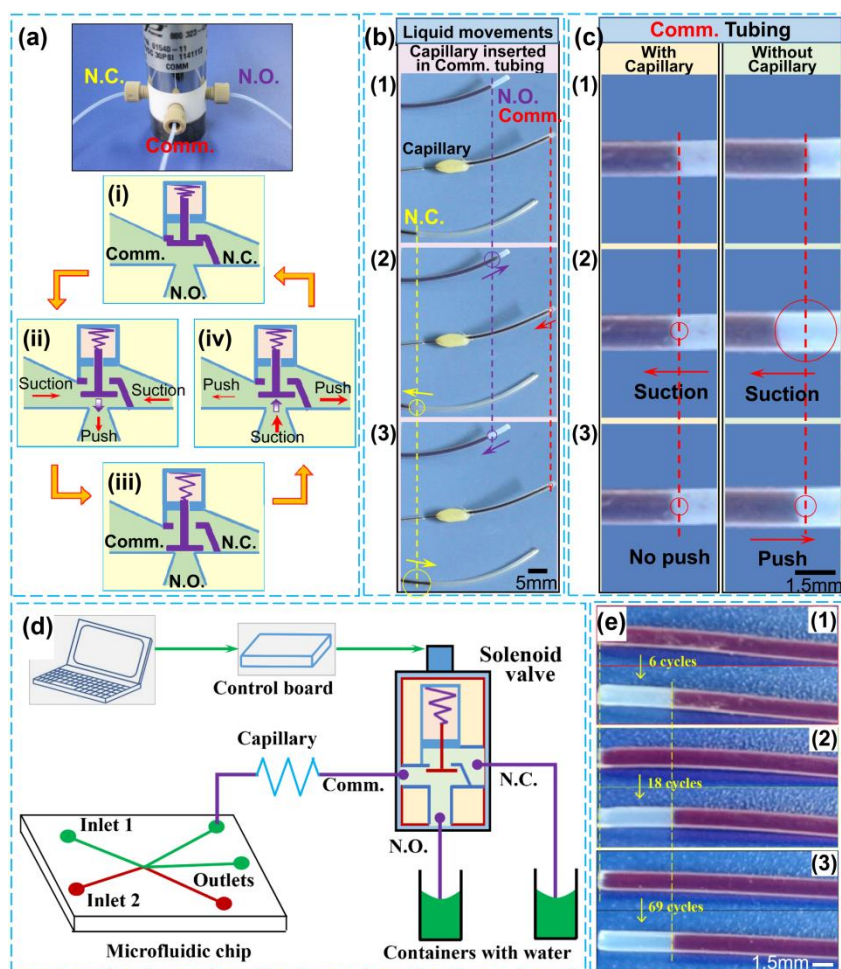

156

157 **Supplementary Fig. S7** Capillary-tuned solenoid valve suction. (a) Schematics of the  
 158 operating principle of the solenoid valve in a full work cycle: being energized from (i)  
 159 to (ii) then to (iii) and being de-energized from (iii) to (iv) and then back to (i). (b)  
 160 Results of the capillary-tuned solenoid valve suction. Three different colored arrows  
 161 (“purple” for “N.O.,” “red” for “Comm.,” and “yellow” for “N.C.”) show the  
 162 directions of the movement of the liquid/air interfaces in each tubing connected with  
 163 the related port of the solenoid valve while the valve was actuated (“Comm.” tubing  
 164 inserted with a piece of capillary): (1) a de-energized state; (2) the energized state  
 165 after being energized from (1); (3) the new de-energized state after being de-energized  
 166 from (2). (c) Two sets of zoomed pictures from (b) showing the liquid/air interfaces in  
 167 “Comm.” tubing, with and without the capillary. (d) The assembly of  
 168 solenoid-valve-suction based system. (e) The suction volume can be used to indirectly  
 169 evaluate the suction force. The suction force can be adjusted by changing the  
 170 hydrodynamic resistance of the inserted capillary. Adapted from Ref. 15 with  
 171 permission from The Royal Society of Chemistry.

172 **Supplementary Video**

173 **Supplementary Video S1** The whole process of single-cell isolation.

174

175 **References**

- 176 1. Johnson, E.A. *Phaffia rhodozyma*: colorful odyssey. *Int. Microbiol.* **6**, 169-174  
177 (2003).
- 178 2. Ji, Y. *et al.* Raman spectroscopy provides a rapid, non-invasive method for  
179 quantitation of starch in live, unicellular microalgae. *Biotechnol. J.* **9**,  
180 1512-1518 (2014).
- 181 3. Teste, M.A. *et al.* Validation of reference genes for quantitative expression  
182 analysis by real-time RT-PCR in *Saccharomyces cerevisiae*. *BMC Mol. Biol.*  
183 **10**, 99 (2009).
- 184 4. Picelli, S. *et al.* Full-length RNA-seq from single cells using Smart-seq2. *Nat.*  
185 *Protoc.* **9**, 171-181 (2014).
- 186 5. Meuser, J.E. *et al.* Phenotypic diversity of hydrogen production in  
187 chlorophycean algae reflects distinct anaerobic metabolisms. *J. Biotechnol.*  
188 **142**, 21-30 (2009).
- 189 6. Dean, F.B. *et al.* Rapid amplification of plasmid and phage DNA using phi29  
190 DNA polymerase and multiply-primed rolling circle amplification. *Genome*  
191 *Res.* **11**, 1095-1099 (2001).
- 192 7. Rinke, C. *et al.* Insights into the phylogeny and coding potential of microbial  
193 dark matter. *Nature* **499**, 431-437 (2013).
- 194 8. Woyke, T. *et al.* Decontamination of MDA reagents for single cell whole  
195 genome amplification. *PLoS One* **6**, e26161 (2011).
- 196 9. Kurtzman, C.P. & Robnett, C.J. Identification and phylogeny of ascomycetous  
197 yeasts from analysis of nuclear large subunit (26S) ribosomal DNA partial  
198 sequences. *Antonie Van Leeuwenhoek* **73**, 331-371 (1998).
- 199 10. Kim, D.H., Brunt, J. & Austin, B. Microbial diversity of intestinal contents  
200 and mucus in rainbow trout (*Oncorhynchus mykiss*). *J. Appl. Microbiol.* **102**,  
201 1654-1664 (2007).
- 202 11. Lasken, R.S. Single-cell genomic sequencing using Multiple Displacement  
203 Amplification. *Curr. Opin. Microbiol.* **10**, 510-516 (2007).
- 204 12. Langmead, B. *et al.* Ultrafast and memory-efficient alignment of short DNA  
205 sequences to the human genome. *Genome Biol.* **10**, R25 (2009).
- 206 13. Peng, Y. *et al.* IDBA-UD: a de novo assembler for single-cell and  
207 metagenomic sequencing data with highly uneven depth. *Bioinformatics* **28**,  
208 1420-1428 (2012).
- 209 14. Crabtree, J. *et al.* Circleator: flexible circular visualization of  
210 genome-associated data with BioPerl and SVG. *Bioinformatics* **30**, 3125-3127  
211 (2014).
- 212 15. Zhang, Q. *et al.* On-demand control of microfluidic flow via capillary-tuned  
213 solenoid microvalve suction. *Lab Chip* **14**, 4599-4603 (2014).
